# Supplementary material
Source: PubMed Central journal article supplement (PMC3149371)
Supplement: supp_M111.252494_jbc.M111.252494-1.pdf [file supp_M111.252494_jbc.M111.252494-1.pdf]

## **SUPPLEMENTARY MATERIAL**

Supp. Fig. S1. Sensorgrams from SPR measurements conducted for (A) wild-type SAP30 SID and for (B) V148E, (C) F186E, and (D) F200E SAP30 SID mutants. All experiments were conducted under identical ambient conditions with the mSin3A PAH3 immobilized on a dextran chip and the various SAP30 SID proteins as the analyte.

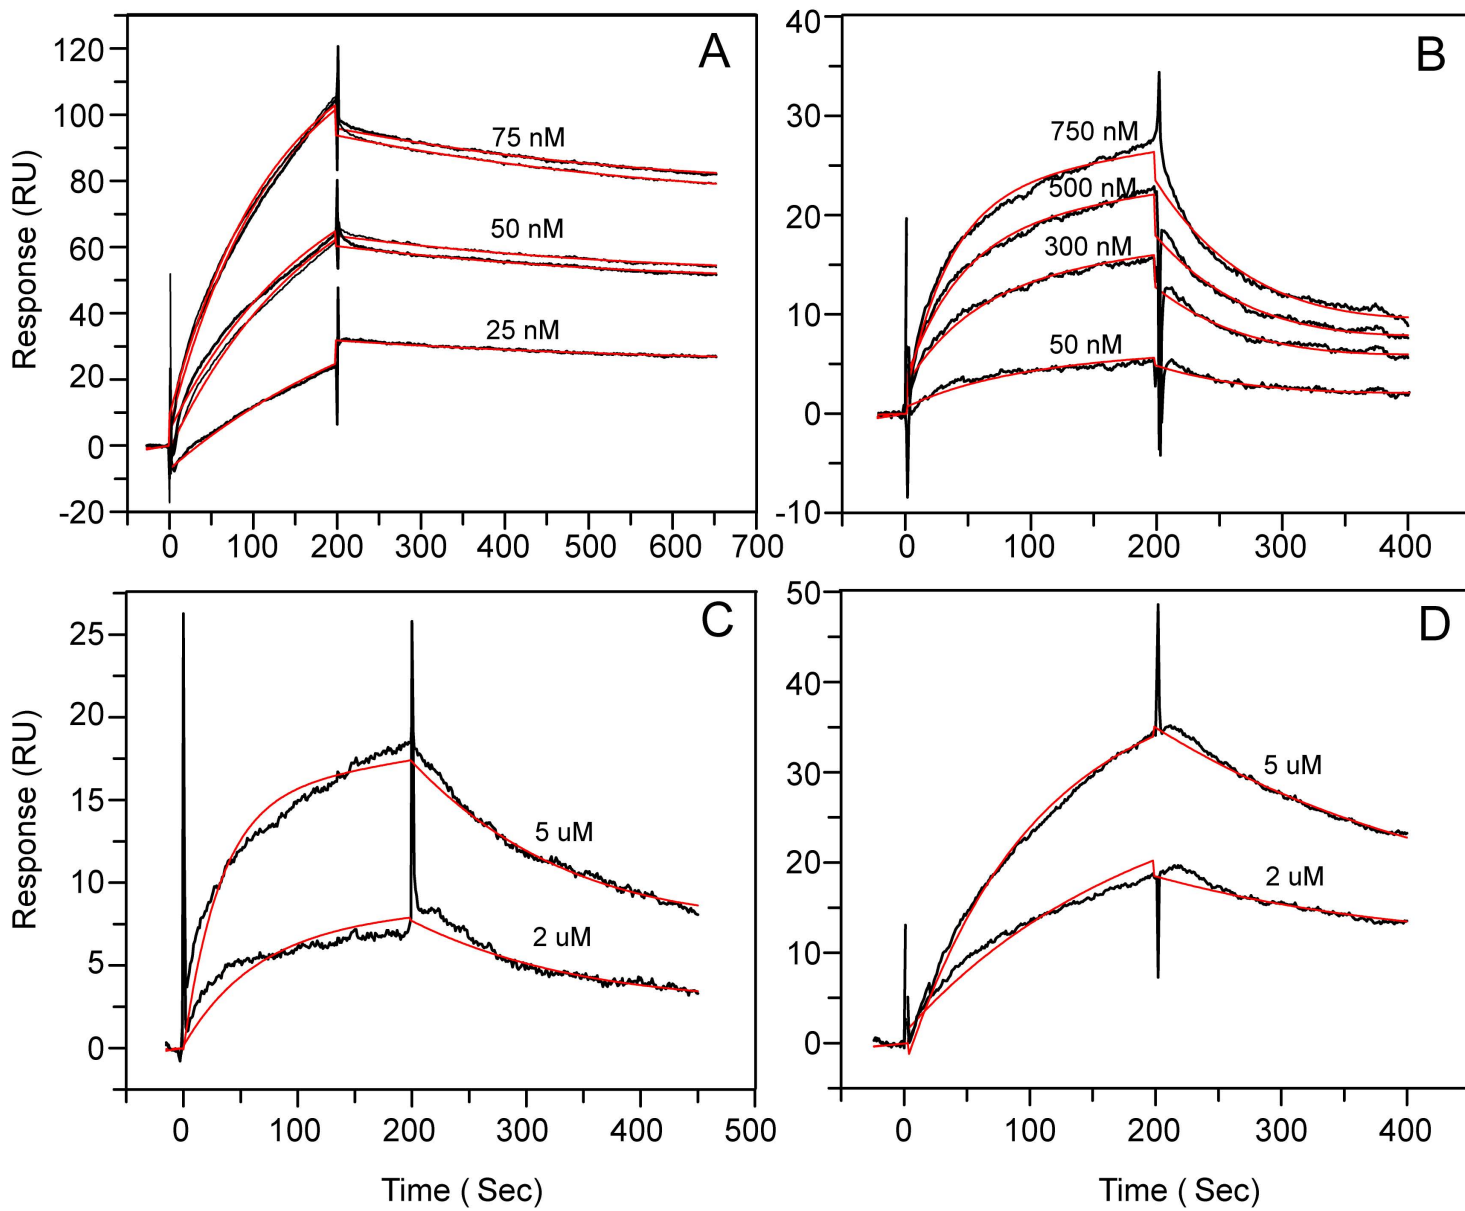

Supplementary Figure S1
